# Supplementary material
Source: PubMed Central journal article supplement (PMC4859594)
Supplement: JB.01034-15_zjb999094002so1.pdf [file JB.01034-15_zjb999094002so1.pdf]

TABLE S1. *E. coli* strains and plasmids

| <i>E. coli</i> Strains | Genotype                                                                                                                                                                              | Source or Reference    |
|------------------------|---------------------------------------------------------------------------------------------------------------------------------------------------------------------------------------|------------------------|
| DH5 $\alpha$           | $\Phi 80\Delta lacZ\Delta M15 \Delta(lacZYA-argF)U169 deoR recA1 endA hsdR17(rk-,mk+) phoA supE44 thi-1gyrA96 relA1$                                                                  | Lab collection         |
| MG1655                 | F- $\lambda-$ <i>ilvG rfb-50 rph-1</i>                                                                                                                                                | Lab collection         |
| BMKM111-3              | <i>thr-1 leuB6 proA2 thr-1 argE3 lacY1 galK2 ara-14 xyl-5 thi-1 rpsL31 mtl-1 tsx-33 supE44 D(recC ptr recB recD)::Plac-bet exo cmr <math>\Delta</math>yrfF307::res-npt-res (KanR)</i> | Lab collection         |
| DR1                    | MG1655 <i>rcsB11::<math>\Delta</math>Tn10</i>                                                                                                                                         | (1)                    |
| DR5                    | MG1655 $\Delta$ <i>rcsF::frit</i>                                                                                                                                                     | (1)                    |
| DR6                    | MG1655 <i>rcsA72::<math>\Delta</math>Tn10</i>                                                                                                                                         | (1)                    |
| DR5-PF                 | DR5 / pFtsAZ                                                                                                                                                                          | This work              |
| DR5-PL                 | DR5 / pLolA                                                                                                                                                                           | This work              |
| DR20                   | MG1655 $\Delta$ <i>osmB::kan</i>                                                                                                                                                      | This work              |
| JW5239-4               | BW25113 $\Delta$ <i>bdm-774::kan</i>                                                                                                                                                  | Kieo collection (2)    |
| DR21                   | MG1655 $\Delta$ <i>bdm-774::kan</i>                                                                                                                                                   | MG1655 + P1 (JW5239-4) |
| JW1477-1               | BW25113 $\Delta$ <i>osmC775::kan</i>                                                                                                                                                  | Kieo collection (2)    |
| DR22                   | MG1655 $\Delta$ <i>osmC775::kan</i>                                                                                                                                                   | MG1655 + P1 (JW1477-1) |
| JW1488-7               | MG1655 $\Delta$ <i>gadB786::kan</i>                                                                                                                                                   | Kieo collection (2)    |
| DR23                   | MG1655 $\Delta$ <i>gadB786::kan</i>                                                                                                                                                   | MG1655 + P1 (JW1488-7) |
| DR24                   | MG1655 $\Delta$ <i>safA::kan</i>                                                                                                                                                      | This work              |
| JW1495-1               | BW25113 $\Delta$ <i>ydeP722::kan</i>                                                                                                                                                  | Kieo collection (2)    |
| DR25                   | MG1655 $\Delta$ <i>ydeP722::kan</i>                                                                                                                                                   | MG1655 + P1 (JW1495-1) |
| DR26                   | MG1655 $\Delta$ <i>rprA::kan</i>                                                                                                                                                      | This work              |
| JW3478-1               | BW25113 $\Delta$ <i>hdeA765::kan</i>                                                                                                                                                  | Kieo collection (2)    |
| DR27                   | MG1655 $\Delta$ <i>hdeA765::kan</i>                                                                                                                                                   | MG1655 + P1 (JW3478-1) |
| JW3479-1               | BW25113 $\Delta$ <i>hdeD766::kan</i>                                                                                                                                                  | Kieo collection (2)    |
| DR28                   | MG1655 $\Delta$ <i>hdeD766::kan</i>                                                                                                                                                   | MG1655 + P1 (JW3479-1) |
| DR29                   | MG1655 $\Delta$ <i>gadY::kan</i>                                                                                                                                                      | This work              |
| JW3485-1               | BW25113 $\Delta$ <i>gadA772::kan</i>                                                                                                                                                  | Kieo collection (2)    |
| DR30                   | MG1655 $\Delta$ <i>gadA772::kan</i>                                                                                                                                                   | MG1655 + P1 (JW3485-1) |
| JW1023-1               | BW25113 $\Delta$ <i>csgD781::kan</i>                                                                                                                                                  | Kieo collection (2)    |
| KE27                   | MG1655 $\Delta$ <i>csgD781::kan</i>                                                                                                                                                   | MG1655 + P1 (JW1023-1) |
| DR31                   | DR5 $\Delta$ <i>csgD::kan</i>                                                                                                                                                         | DR5 + P1 (JW1023)      |
| JW1881-1               | BW25113 $\Delta$ <i>flhD745::kan</i>                                                                                                                                                  | Kieo collection (2)    |
| DR32                   | MG1655 $\Delta$ <i>flhD745::kan</i>                                                                                                                                                   | MG1655 + P1 (JW1881-1) |
| DR33                   | DR6 $\Delta$ <i>flhD745::kan</i>                                                                                                                                                      | DR6 + P1 (DR32)        |
| DR34                   | MG1655 $\Delta$ <i>yjbE::kan</i>                                                                                                                                                      | This work              |
| DR35                   | MG1655 $\Delta$ <i>wza::kan</i>                                                                                                                                                       | This work              |
| DR36                   | MG1655 $\Delta$ <i>wza::frit</i>                                                                                                                                                      | This work              |
| DR37                   | DR36 / pWza                                                                                                                                                                           | This work              |

|      |                                           |                 |
|------|-------------------------------------------|-----------------|
| DR38 | MG1655 $\Delta[wza-wcaM]::frt$            | This work       |
| DR39 | MG1655 $\Delta wcaD::frt$                 | This work       |
| DR40 | MG1655 $\Delta wxzC::frt$                 | This work       |
| DR41 | MG1655 $\Delta cpsB::frt$                 | This work       |
| DR42 | MG1655 $\Delta cpsG::frt$                 | This work       |
| DR43 | DR42 / pCpsG                              | This work       |
| DR44 | MG1655 $\Delta ugd::frt$                  | This work       |
| DR45 | DR44 / pUgd                               | This work       |
| DR46 | MG1655 $\Delta wcaJ::frt$                 | This work       |
| DR47 | MG1655 $\Delta wcaJ \Delta wxzC::frt$     | This work       |
| DR48 | MG1655 $\Delta cpsG \Delta wcaJ::kan$     | This work       |
| DR49 | MG1655 $\Delta ugd::frt \Delta wcaJ::kan$ | This work       |
| DR50 | MG1655 / pWcaJ                            | This work       |
| DR51 | DR38 / pWcaJ                              | This work       |
| DR52 | DR36 / pUppS                              | This work       |
| DR53 | DR44 / pUppS                              | This work       |
| DR54 | DR36 / pUppP                              | This work       |
| DR55 | DR44 / pUppP                              | This work       |
| DR56 | MG1655 $\Delta uppP::kan$                 | This work       |
| DR57 | DR38 <i>rcsB::Tn10</i>                    | DR38 + P1 (DR1) |

| Plasmids |                                                                              |           |
|----------|------------------------------------------------------------------------------|-----------|
| pDEV     | <i>colE1 lacI<sup>q</sup> P<sub>lac</sub> (<math>\Delta lacZ</math>) kan</i> | (1)       |
| pDKR2    | pDEV- <i>P<sub>lac</sub>::dsbAss-sfgfp</i>                                   | (1)       |
| pFtsAZ   | pDEV- <i>P<sub>lac</sub>::ftsAZ</i>                                          | This work |
| pLolA    | pDEV- <i>P<sub>lac</sub>::lolA</i>                                           | This work |
| pWza     | pDEV- <i>P<sub>lac</sub>::wza</i>                                            | This work |
| pCpsG    | pDEV- <i>P<sub>lac</sub>::cpsG</i>                                           | This work |
| pUgd     | pDEV- <i>P<sub>lac</sub>::ugd</i>                                            | This work |
| pWcaJ    | pDEV- <i>P<sub>lac</sub>::wcaJ</i>                                           | This work |
| pUppS    | pDEV- <i>P<sub>lac</sub>::uppS</i>                                           | This work |
| pUppP    | pDEV- <i>P<sub>lac</sub>::uppP</i>                                           | This work |

TABLE S2. Primers

| To construct             | Primer Name | Forward, F or Reverse, R | Sequences                                                                     |
|--------------------------|-------------|--------------------------|-------------------------------------------------------------------------------|
| pFtsAZ                   | DP132       | F                        | CGCGGATCCTGATTAAC <del>TT</del> TATAAGGAGGAAAAACAT<br>ATGATCAAGGCGACGGACAG    |
|                          | DP55        | R                        | GCGCTGCAGT <del>TAAT</del> CAGCTTGCTTACGCA                                    |
| pLolA                    | DP152       | F                        | CGCGAATTCGGGAGTGACGTAATTTGAGGAATAATG                                          |
|                          | DP150       | R                        | CGCGGATCCCTACTTACGTTGATCATCTACCG                                              |
| pWza                     | DP364       | F                        | CGCGGATCCTGATTAAC <del>TT</del> TATAAGGAGGAAAAACAT<br>ATGATGAAATCCAAAATGAAATT |
|                          | DP365       | R                        | CGCAAGCTTTTACCAGTTATGAATGTCGC                                                 |
| pCpsG                    | DP277       | F                        | CCGGGATCCTGATTAAC <del>TT</del> TATAAGGAGGAAAAACAT<br>ATGAAAAATTAACCTGCTTTAA  |
|                          | DP278       | R                        | CGCAAGCTTTTACTCGTTCAGCAACGTC                                                  |
| pUgd                     | DP330       | F                        | CGCGGATCCTGATTAAC <del>TT</del> TATAAGGAGGAAAAACAT<br>ATGAAAATCACCATTCCGGTAC  |
|                          | DP331       | R                        | CGCAAGCTTGCCCTGATAACAAGATGTTA                                                 |
| pWcaJ                    | DP316       | F                        | CGCGAATTCCTGATTAAC <del>TT</del> TATAAGGAGGAAAAACAT<br>GTGATGTTGTCTGCTACTCA   |
|                          | DP317       | R                        | CGCAAGCTTTCAATATGCCGCTTTGTTAACG                                               |
| pUppS                    | DP314       | F                        | CGCGAATTCCTGTCAGGGAATAAAAAACGCGTG                                             |
|                          | DP315       | R                        | CGCAAGCTTTCAGGCTGTTTCATCACCG                                                  |
| pUppP                    | DP326       | F                        | CGCGAATTCATAATTTAGGGGTTTATTG                                                  |
|                          | DP327       | R                        | CGCAAGCTTTTAAAAGAACACGACATACA                                                 |
| DR20<br>( <i>ΔosmB</i> ) | DP141       | F                        | TTAGCTATTATAGTTATAGAGAGCTTACTTCCGTGAAT<br>CAATTCGGGGATCCGTCGACC               |
|                          | DP142       | R                        | TAATCGACATTTATTTACGATTATTTACCGACCTGGTG<br>ACTGTAGGCTGGAGCTGCTTCG              |
| DR24<br>( <i>ΔsafA</i> ) | DP211       | F                        | AACGATTTTTAACGTTATCCGCTAAATAAACATATTTG<br>AAATTCGGGGATCCGTCGACC               |
|                          | DP212       | R                        | ACTTTTTTAACATTTCATATTTATAATTTGCTGTTTGT<br>TTGTAGGCTGGAGCTGCTTCG               |
| DR26<br>( <i>ΔrprA</i> ) | DP130       | F                        | TCTGATCGACGCAAAAAGTCCGTATGCCTACTATTAGC<br>TCATTCGGGGATCCGTCGACC               |
|                          | DP131       | R                        | GCGAGGTAGCGAAGCGGAAAAATGTTAAAAAAAAGC<br>CCATTGTAGGCTGGAGCTGCTTCG              |
| DR29<br>( <i>ΔgadY</i> ) | DP207       | F                        | AATGGCTGATCTTATTTCCAGTAAAAGTTATATTTAAC<br>TTATTCGGGGATCCGTCGACC               |
|                          | DP208       | R                        | CTGCGGAAGGAATAAGATTATAGAGTTTTACTCAGAC<br>ATATGTAGGCTGGAGCTGCTTCG              |
| DR34<br>( <i>ΔyjbE</i> ) | DP309       | F                        | TTTGGGTAAATCTCCATTCATTCAATGAAGGGAAATTG<br>TTATTCGGGGATCCGTCGACC               |
|                          | DP310       | R                        | TGCAATGACTCGAATTATTTTGGGGATACATACTTTAT<br>TATGTAGGCTGGAGCTGCTTCG              |
| DR35<br>( <i>Δwza</i> )  | DP279       | F                        | TTGCACAGTACTTCCGGGCAGCAATATGTCGACGATGG<br>GCTGTGTAGGCTGGAGCTGCTT              |

|                              |       |   |                                                                   |
|------------------------------|-------|---|-------------------------------------------------------------------|
|                              | DP280 | R | GGCAAATATTGCCGACACAGACAACCTAAGATGTTGTT<br>AAACATATGAATATCCTCCTTAG |
| DR38<br>[ <i>Δwza-wcaM</i> ] | DP263 | R | TACTGACACCAATAATGGCATCAATTTTCATTTTGGATT<br>TTGTAGGCTGGAGCTGCTTCG  |
|                              | DP273 | R | TCCTAAGTATGACTCCATTTTCCAGGAATGGTCGCAA<br>ATTGTAGGCTGGAGCTGCTTCG   |
| DR39<br>( <i>ΔwcaD</i> )     | DP351 | F | CTACCTGTTGCTGCCGCTGATTTATCTGCTGGTTAACGT<br>CATTCCGGGGATCCGTCGACC  |
|                              | DP352 | R | TTACCTCGTAATATTTAACGCTTTTCGCAAAATAAACG<br>GATGTAGGCTGGAGCTGCTTCG  |
| DR40<br>( <i>ΔwzxC</i> )     | DP350 | F | TATGAGCTTACGTGAAAAACCATCAGCGGCGCGAAG<br>TGGATTCCGGGGATCCGTCGACC   |
|                              | DP298 | R | AACCGAAAACAGCAACTCACCCCGCCCGTAAAAGCAT<br>TTTTGTAGGCTGGAGCTGCTTCG  |
| DR41<br>( <i>ΔcpsB</i> )     | DP265 | F | ACGTGTTACGTCAATTTATAAATGATATTCGGGGATAA<br>TTATTCCGGGGATCCGTCGACC  |
|                              | DP266 | R | TACACCGCGGTTTCGCATTCATTGCCTGATGCGACGTT<br>TATGTAGGCTGGAGCTGCTTCG  |
| DR42<br>( <i>ΔcpsG</i> )     | DP267 | F | TTCGGTCAGGGCCAACCTATTGCCTGAAAAAGGGTAAC<br>GATATTCCGGGGATCCGTCGACC |
|                              | DP268 | R | GCCCCTTACCCGCAGTGGGGTAAGGGAAGATCCGACA<br>TTATGTAGGCTGGAGCTGCTTCG  |
| DR44<br>( <i>Δugd</i> )      | DP321 | F | ACATCATGATTCACAGTTAAGTTAATTCTGAGAGCATG<br>AAATTCCGGGGATCCGTCGACC  |
|                              | DP322 | R | GGGCGTAAATAGCCCTGATAACAAGATGTTAGTCGCT<br>GCCTGTAGGCTGGAGCTGCTTCG  |
| DR46<br>( <i>ΔwcaJ</i> )     | DP283 | F | GGATCTTCCCTTACCCCACTGCGGGTAAGGGGCTAATA<br>ACATTCCGGGGATCCGTCGACC  |
|                              | DP284 | R | CGACAATCGACATCCCCCGGTCAGCACATTGATAAA<br>CTGTGTAGGCTGGAGCTGCTTCG   |
| DR56<br>( <i>ΔuppP</i> )     | DP322 | F | ACGCAGTAGTTCGGACAAGCGGTACATTTTAATAATTT<br>AGATTCCGGGGATCCGTCGACC  |
|                              | DP333 | R | CAATCGTTGACAACGCCAAGCATCCGACACTATTCCTC<br>AATGTAGGCTGGAGCTGCTTCG  |

BamHI, GGATTC; PstI, CTGCAG; EcoRI, GAATTC; HindIII, AAGCTT

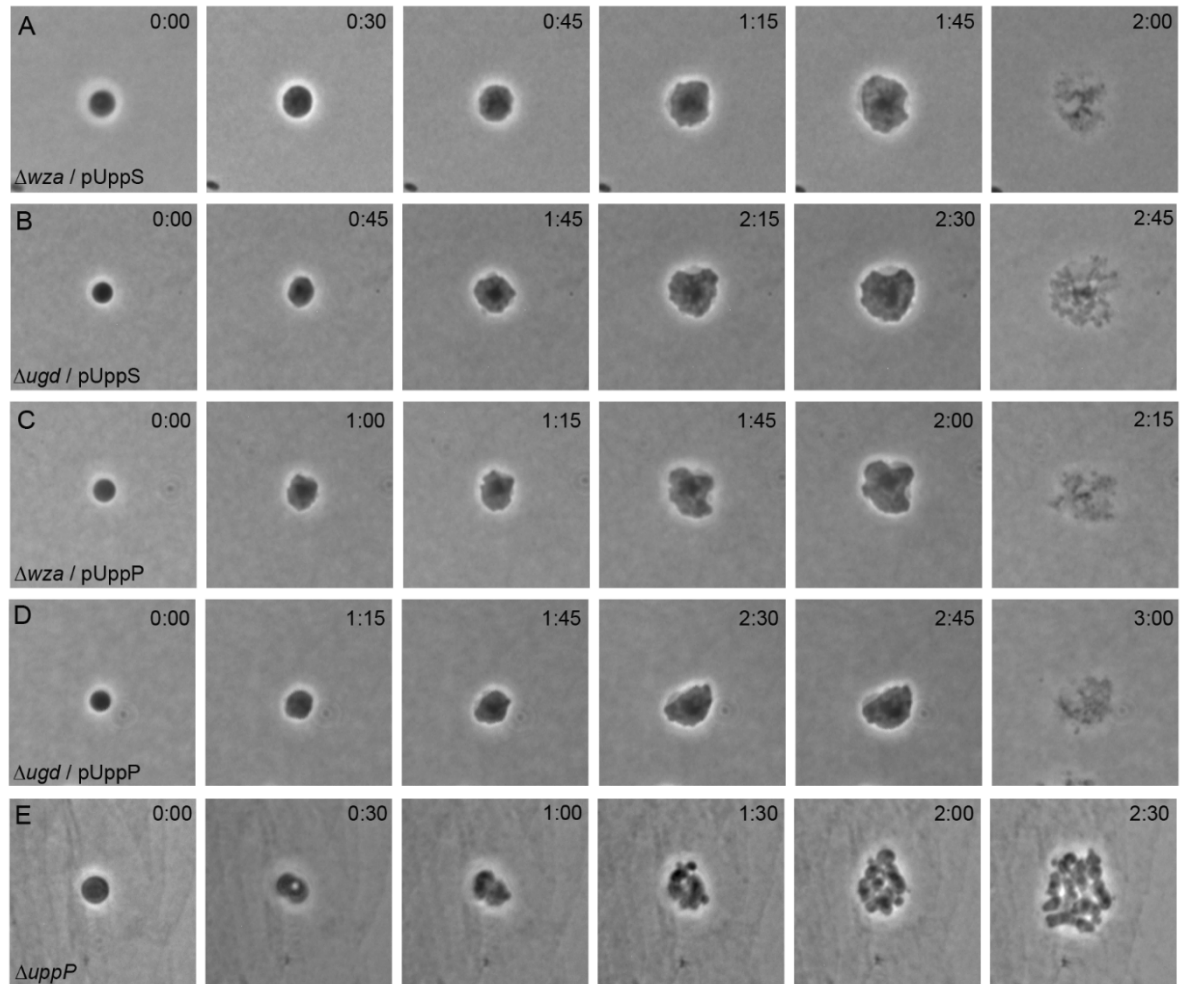

Fig. S1. Undecaprenyl phosphate (Und-P) levels did not suppress WcaJ-generated toxicity and failed to rescue spheroplast recovery. Spheroplasts from the indicated strains were grown on osmotically protected sucrose recovery medium and the recovery process was monitored by time-lapse microscopy. Time after plating is displayed in the upper right-hand corner of each panel (h:min). The images are representative results. A. *E. coli* DR52 (N = 9), B. *E. coli* DR53 (N=16), C. *E. coli* DR54 (N = 9), D. *E. coli* DR55 (N = 4), E. *E. coli* DR56 (N = 8).

### Supplemental References

1. **Ranjit, D. K., and K. D. Young.** 2013. The Rcs stress response and accessory envelope proteins are required for *de novo* generation of cell shape in *Escherichia coli*. *J Bacteriol* **195**:2452-2462.
2. **Baba, T., T. Ara, M. Hasegawa, Y. Takai, Y. Okumura, M. Baba, K. A. Datsenko, M. Tomita, B. L. Wanner, and H. Mori.** 2006. Construction of *Escherichia coli* K-12 in-frame, single-gene knockout mutants: the Keio collection. *Mol Syst Biol* **2**:2006 0008.
